# Supplementary material
Source: publisher site journal article supplement (https://zoologia.pensoft.net/article/19864/download/suppl/32/)
Supplement: Supplementary file 1

## Appendix S2: Wear categories

Four dental classes could be described based on the wear differences observed on the occlusal view of the surface of M1–M3. It could be noted that there was some variation within the categories as the amount of dentine exposed when two cusps articulate with wear. The categories of wear used were identified by the following descriptions:

**Class 1** – Cusps high with no wear or slightly worn, separated by enamel in occlusal surface; presence of well-marked anteromedian flexus, separating the anterocone into labial and lingual conules; and paracone and metacone surrounded by flexus.

**Class 2** – Cusp are slightly worn and joined by small dentine pools; dentine is slightly exposed to well exposed; and paracone and metacone surrounded by flexus.

**Class 3** – Cusp worn and flattened, connected by exposed dentine and near the respective margins, without round appearance; anteromedian flexus absent or poorly marked; M1 with paracone and metacone surrounded or partially surrounded by paraflexus and metaflexus; and M2 and M3 are well worn, with dentine almost fully exposed, but some flexus still visible.

**Class 4** – Cusp totally worn on the crown margin or absent, flattened, and joined by dentine; some flexus still visible and reduced in M1; and M2 and M3 totally flat without visible flexus.
